# Supplementary material
Source: bioRxiv or medRxiv preprint supplement (http://biorxiv.org/highwire/filestream/18570/field_highwire_adjunct_files/1/067389-2.pdf)
Supplement: Supplementary file [file 067389-2.pdf]

# 1 Supplementary Tables

## 2 A. Intrinsic and synaptic properties of GC models for the pruning and the growth experiments

|                     | Pruning Experiment      |              |              |              | Growth Experiment       |              |              |              |
|---------------------|-------------------------|--------------|--------------|--------------|-------------------------|--------------|--------------|--------------|
| <b>GC models</b>    | R <sub>in</sub><br>(MΩ) | Sag<br>ratio | EPSP<br>(mV) | IPSP<br>(mV) | R <sub>in</sub><br>(MΩ) | Sag<br>ratio | EPSP<br>(mV) | IPSP<br>(mV) |
| <b>12-dendrites</b> | 369                     | 0.91         | 0.62         | -1.37        | 0.91                    | 0.62         | -1.37        | 0.91         |
| <b>6-dendrites</b>  | 387                     | 0.84         | 0.80         | -1.37        | 414                     | 0.74         | 1.10         | -1.37        |
| <b>3-dendrites</b>  | 410                     | 0.73         | 1.12         | -1.42        | 439                     | 0.53         | 2.10         | -1.46        |

## 3 B. Intrinsic and synaptic properties of GC models when all models have the same R<sub>in</sub>

| Pruning Experiment – Match R <sub>in</sub> =369MΩ |                   |              |              |              |              |              |
|---------------------------------------------------|-------------------|--------------|--------------|--------------|--------------|--------------|
|                                                   | g <sub>leak</sub> |              |              | Soma size    |              |              |
| <b>GC models</b>                                  | Sag<br>ratio      | EPSP<br>(mV) | IPSP<br>(mV) | Sag<br>ratio | EPSP<br>(mV) | IPSP<br>(mV) |
| <b>12-dendrites</b>                               | 0.91              | 0.62         | -1.37        | 0.91         | 0.62         | -1.37        |
| <b>6-dendrites</b>                                | 0.84              | 0.77         | -1.37        | 0.85         | 0.75         | -1.36        |
| <b>3-dendrites</b>                                | 0.74              | 1.01         | -1.41        | 0.76         | 0.90         | -1.40        |
| Growth Experiment – Match R <sub>in</sub> =369MΩ  |                   |              |              |              |              |              |
|                                                   | g <sub>leak</sub> |              |              | Soma size    |              |              |
| <b>GC models</b>                                  | Sag<br>ratio      | EPSP<br>(mV) | IPSP<br>(mV) | Sag<br>ratio | EPSP<br>(mV) | IPSP<br>(mV) |
| <b>12-dendrites</b>                               | 0.91              | 0.62         | -1.37        | 0.91         | 0.62         | -1.37        |
| <b>6-dendrites</b>                                | 0.75              | 1.01         | -1.36        | 0.77         | 0.93         | -1.35        |
| <b>3-dendrites</b>                                | 0.58              | 1.72         | -1.44        | 0.64         | 1.34         | -1.36        |

4

5 C. Intrinsic and synaptic properties of GC models with matched sparsity

|                     | Match sparsity distributions (~5-8%) |              |              |              |                           |              |              |              |
|---------------------|--------------------------------------|--------------|--------------|--------------|---------------------------|--------------|--------------|--------------|
|                     | $g_{leak}$                           |              |              |              | Soma size                 |              |              |              |
| <b>GC models</b>    | $R_{in}$<br>(M $\Omega$ )            | Sag<br>ratio | EPSP<br>(mV) | IPSP<br>(mV) | $R_{in}$<br>(M $\Omega$ ) | Sag<br>ratio | EPSP<br>(mV) | IPSP<br>(mV) |
| <b>12-dendrites</b> | 369                                  | 0.91         | 0.62         | -1.37        | 369                       | 0.91         | 0.62         | -1.37        |
| <b>6-dendrites</b>  | 345                                  | 0.83         | 0.73         | -1.36        | 353                       | 0.85         | 0.70         | -1.35        |
| <b>3-dendrites</b>  | 328                                  | 0.74         | 1.00         | -1.39        | 347                       | 0.76         | 0.90         | -1.37        |

6
